# Supplementary material
Source: Research Square preprint supplement (doi:10.21203/rs.3.rs-9239136/v1)
Supplement: Supplementary file 1 [file 88b504e79f585dc52f1b3a70.docx]

**Figure S1**


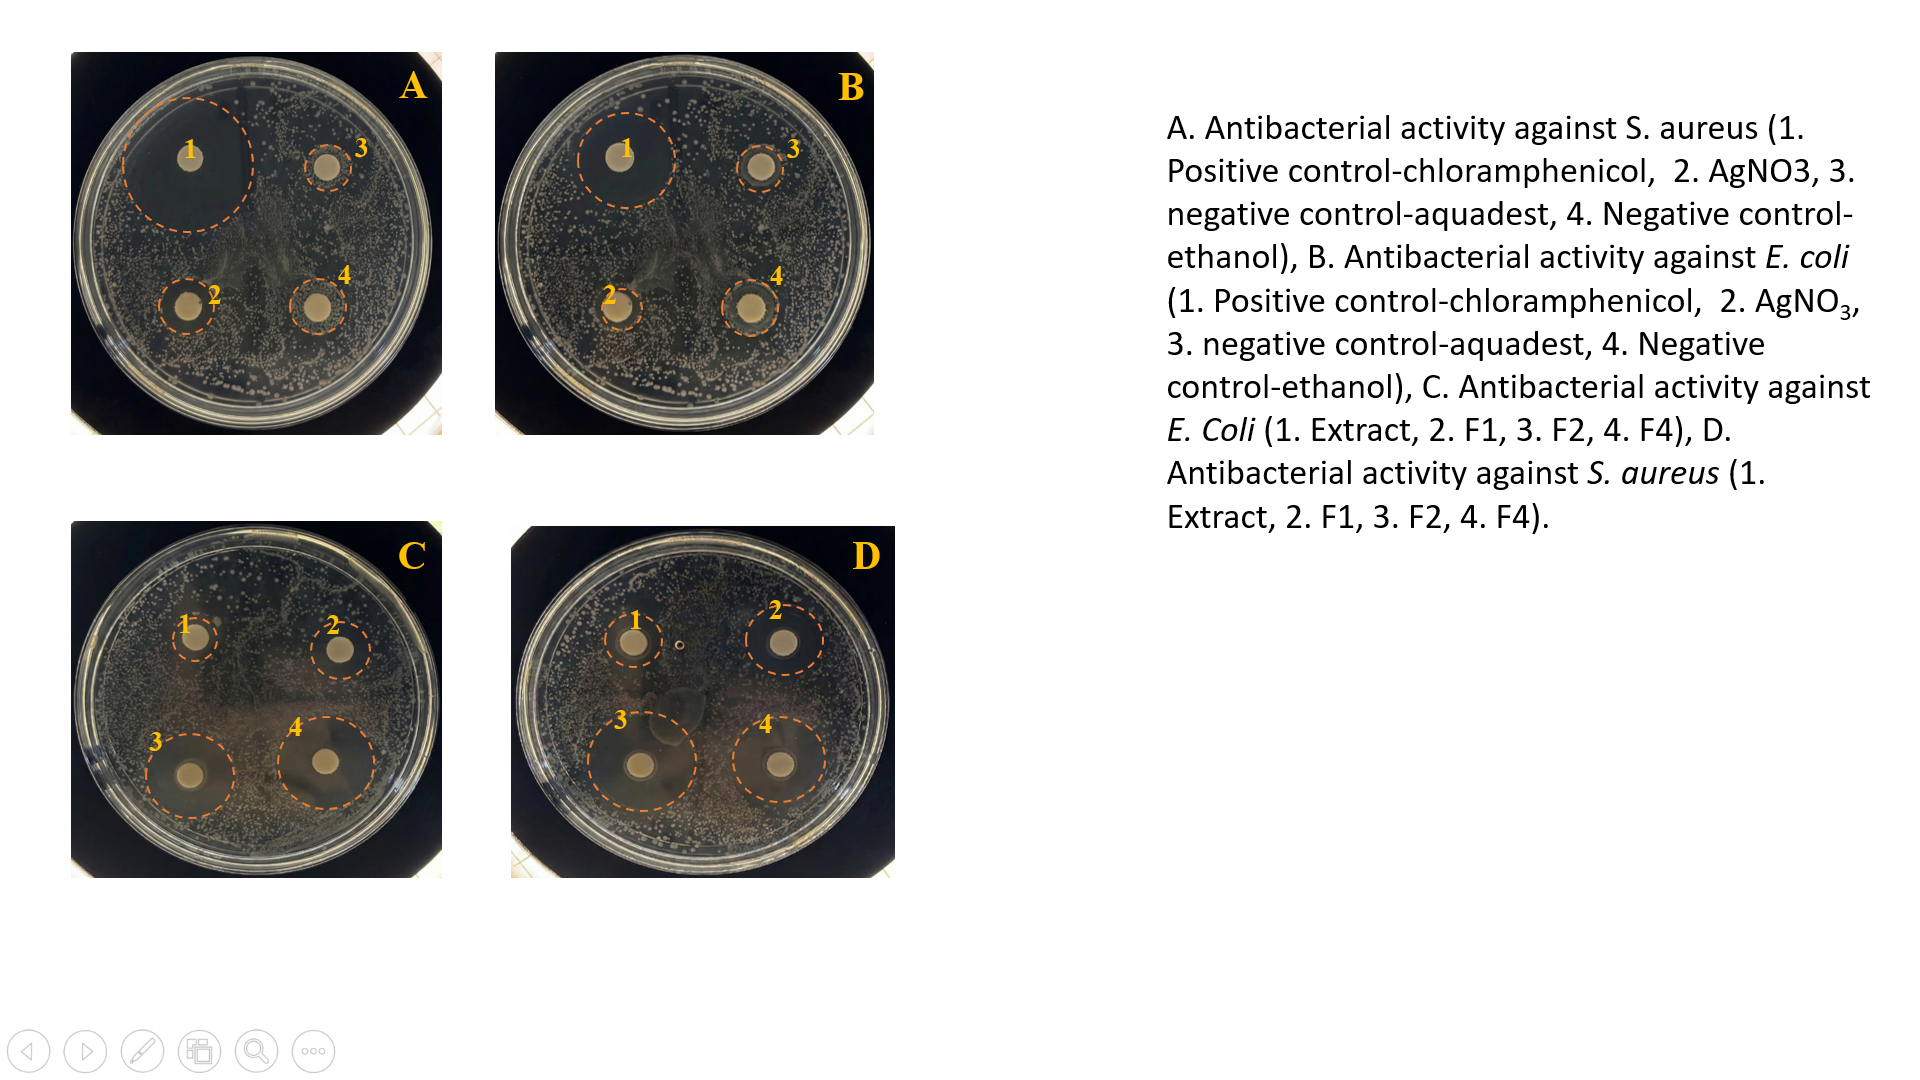


**Figure S1**. A. Antibacterial activity against S. aureus (1. Positive control-chloramphenicol, 2. AgNO3, 3. negative control-aquadest, 4. Negative control-ethanol), B. Antibacterial activity against *E. coli* (1. Positive control-chloramphenicol, 2. AgNO3, 3. negative control-aquadest, 4. Negative control-ethanol), C. Antibacterial activity against *E. Coli* (1. Extract, 2. F1, 3. F2, 4. F4), D. Antibacterial activity against *S. aureus* (1. Extract, 2. F1, 3. F2, 4. F4).
